# Supplementary material
Source: Springer Nature journal article supplement (https://www.springermedizin.de/resource/supplementary/13256_2014_2963_MOESM2_ESM.pdf/9650920)

**A**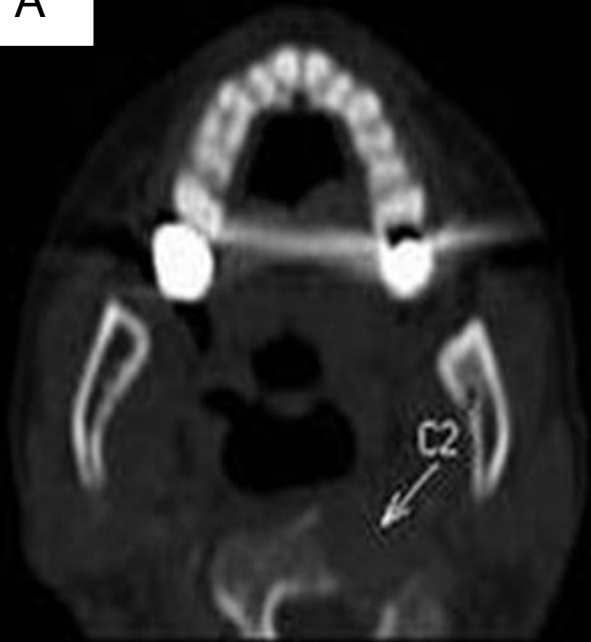**B**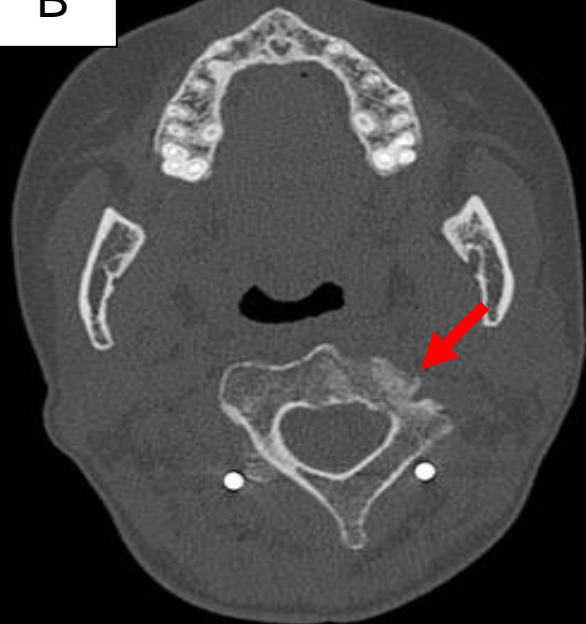

Supplement: MOESM2 [file 9650920]
